# Supplementary material
Source: PubMed Central journal article supplement (PMC2583561)

## SUPPLEMENTARY FIGURES

**Supplementary Figure 1.** *Leukocyte gating strategy.* Representative data and gates are shown for the described experiments.

**Supplementary Figure 2.** *Functional analysis of nodes identifies distinct biological processes.* The data from each node were subject to 3 functional analyses: gene ontology (using EASE), pathway analysis (Pathway Express), and lexical analysis (LACK). The statistical measures for the analyses are Bonferroni-corrected  $p$  for gene ontology, corrected gamma  $p$  for Pathway Express, and binomial  $p$  for LACK. Interferon-associated responses are shown in green, MHC class I-associated responses in blue, and NK cell-associated responses in red.

**Supplementary Figure 3.** *Absolute leukocyte counts.* Blood was harvested into EDTA tubes and a 100 ul aliquot was treated with RBC lysis buffer, washed, and resuspended in 50 ul PBS. 10 ul was added to 40 ul trypan blue and leukocytes were counted on a hemacytometer. Isolated spleens were homogenized in 10 ml PBS, and 5 ul was added to 45 ul trypan blue and leukocytes were counted on a hemacytometer. Data are presented as means with error bars representing standard deviations for triplicate mice. Statistical significance was assessed using an unpaired two-tailed  $t$ -test assuming unequal variances and a  $p$ -value threshold of 0.05 (represented by the star).

**Supplementary Figure 4.** *Absolute leukocyte counts in the blood.* Absolute leukocyte counts were calculated using frequency data and multiplying it by the mean absolute counts in each corresponding data point represented in Figure 2. Day 0 data was used for all mock-infected samples. Data are presented as means with error bars representing standard deviations. Statistical significance was assessed using an unpaired two-tailed *t*-test assuming unequal variances and a *p*-value threshold of 0.05 (represented by stars).

**Supplementary Figure 5.** *Absolute leukocyte counts in the spleen.* Methods and data are as described in Supplementary Figure 3, but for spleen.

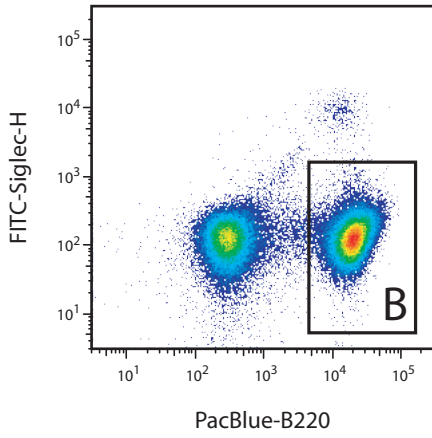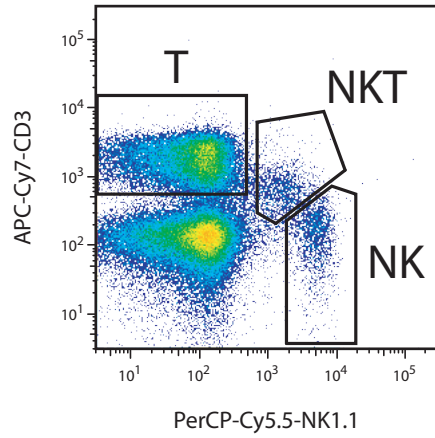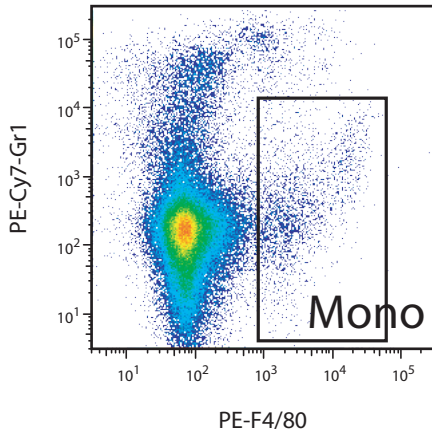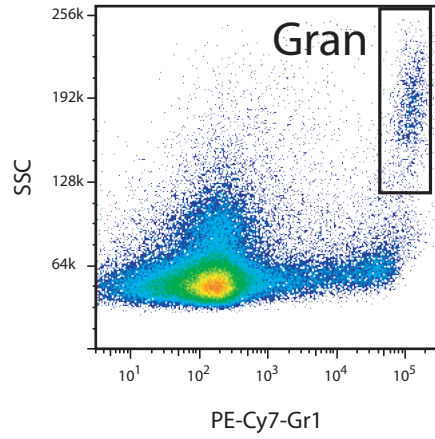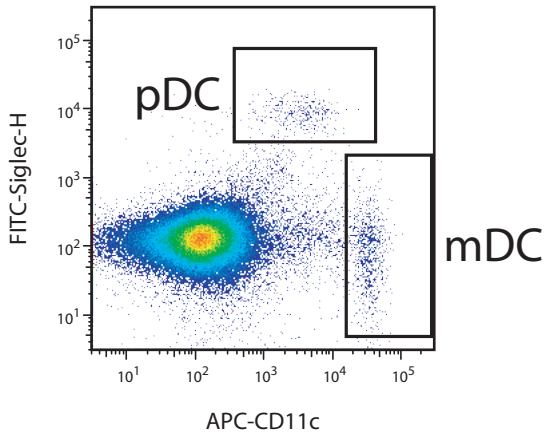

| GO Category                                    | p                                  | KEGG Pathway             | p                                         | Term                    | p                         |                         |
|------------------------------------------------|------------------------------------|--------------------------|-------------------------------------------|-------------------------|---------------------------|-------------------------|
| Early                                          | defense response                   | 4.24 x 10 <sup>-21</sup> |                                           | interferon              | <1.00 x 10 <sup>-10</sup> |                         |
|                                                | response to biotic stimulus        | 2.81 x 10 <sup>-20</sup> |                                           | oligoadenylate          | <1.00 x 10 <sup>-10</sup> |                         |
|                                                | immune response                    | 8.91 x 10 <sup>-19</sup> | Toll-like receptor signaling pathway      | 4.51 x 10 <sup>-5</sup> | guanylate                 | 1.64 x 10 <sup>-5</sup> |
|                                                | response to external stimulus      | 1.32 x 10 <sup>-15</sup> | Cytokine-cytokine receptor interaction    | 1.06 x 10 <sup>-3</sup> | schlafen                  | 4.57 x 10 <sup>-5</sup> |
|                                                | response to pest/pathogen/parasite | 3.32 x 10 <sup>-3</sup>  | Jak-STAT signaling pathway                | 1.10 x 10 <sup>-2</sup> | antigen                   | 5.87 x 10 <sup>-5</sup> |
|                                                | signal transducer activity         | 8.37 x 10 <sup>-3</sup>  |                                           | GTPase                  | 1.39 x 10 <sup>-4</sup>   |                         |
|                                                | cytokine activity                  | 4.97 x 10 <sup>-2</sup>  |                                           | tetratricopeptide       | 3.36 x 10 <sup>-4</sup>   |                         |
|                                                |                                    |                          |                                           | chemokine               | 2.99 x 10 <sup>-3</sup>   |                         |
|                                                |                                    |                          | interleukin                               | 4.68 x 10 <sup>-3</sup> |                           |                         |
| Intermediate                                   | defense response                   | 8.09 x 10 <sup>-36</sup> |                                           | killer                  | <1.00 x 10 <sup>-10</sup> |                         |
|                                                | response to biotic stimulus        | 6.37 x 10 <sup>-33</sup> |                                           | lectin                  | <1.00 x 10 <sup>-10</sup> |                         |
|                                                | immune response                    | 2.65 x 10 <sup>-24</sup> |                                           | histocompatibility      | 9.88 x 10 <sup>-8</sup>   |                         |
|                                                | response to external stimulus      | 1.93 x 10 <sup>-23</sup> |                                           | eosinophil              | 5.54 x 10 <sup>-6</sup>   |                         |
|                                                | signal transducer activity         | 1.92 x 10 <sup>-16</sup> |                                           | platelet                | 1.14 x 10 <sup>-4</sup>   |                         |
|                                                | receptor activity                  | 3.63 x 10 <sup>-11</sup> |                                           | chemokine               | 1.88 x 10 <sup>-4</sup>   |                         |
|                                                | response to pest/pathogen/parasite | 1.99 x 10 <sup>-5</sup>  | Type I diabetes mellitus                  | 2.10 x 10 <sup>-7</sup> | interferon                | 1.03 x 10 <sup>-3</sup> |
|                                                | sugar binding                      | 2.69 x 10 <sup>-5</sup>  | Natural killer cell mediated cytotoxicity | 3.10 x 10 <sup>-7</sup> | antigen                   | 9.60 x 10 <sup>-3</sup> |
|                                                | carbohydrate binding               | 5.14 x 10 <sup>-5</sup>  | Antigen processing and presentation       | 4.05 x 10 <sup>-5</sup> |                           |                         |
|                                                | cytokine activity                  | 2.07 x 10 <sup>-4</sup>  | Cell adhesion molecules (CAMs)            | 3.16 x 10 <sup>-3</sup> |                           |                         |
|                                                | heterophilic cell adhesion         | 7.94 x 10 <sup>-4</sup>  | Cytokine-cytokine receptor interaction    | 3.50 x 10 <sup>-3</sup> |                           |                         |
|                                                | chemokine activity                 | 2.17 x 10 <sup>-3</sup>  |                                           |                         |                           |                         |
|                                                | chemokine receptor binding         | 2.17 x 10 <sup>-3</sup>  |                                           |                         |                           |                         |
|                                                | G-protein-coupled receptor binding | 2.17 x 10 <sup>-3</sup>  |                                           |                         |                           |                         |
|                                                | response to wounding               | 4.65 x 10 <sup>-3</sup>  |                                           |                         |                           |                         |
|                                                | chemoattractant activity           | 6.54 x 10 <sup>-3</sup>  |                                           |                         |                           |                         |
|                                                | cell-cell adhesion                 | 2.08 x 10 <sup>-2</sup>  |                                           |                         |                           |                         |
|                                                | extracellular space                | 2.37 x 10 <sup>-2</sup>  |                                           |                         |                           |                         |
| antigen processing, endogenous via MHC class I | 2.76 x 10 <sup>-2</sup>            |                          |                                           |                         |                           |                         |
| antigen presentation, endogenous antigen       | 4.88 x 10 <sup>-2</sup>            |                          |                                           |                         |                           |                         |
| Late                                           | defense response                   | 1.50 x 10 <sup>-42</sup> |                                           | stefin                  | 4.53 x 10 <sup>-7</sup>   |                         |
|                                                | response to biotic stimulus        | 3.41 x 10 <sup>-39</sup> |                                           | Ig                      | 1.36 x 10 <sup>-4</sup>   |                         |
|                                                | immune response                    | 2.97 x 10 <sup>-30</sup> |                                           | cathepsin               | 1.48 x 10 <sup>-3</sup>   |                         |
|                                                | response to external stimulus      | 3.81 x 10 <sup>-28</sup> |                                           | chemokine               | 4.21 x 10 <sup>-3</sup>   |                         |
|                                                | signal transducer activity         | 3.69 x 10 <sup>-17</sup> |                                           | antigen                 | 2.33 x 10 <sup>-2</sup>   |                         |
|                                                | receptor activity                  | 1.22 x 10 <sup>-11</sup> | Cytokine-cytokine receptor interaction    | 1.37 x 10 <sup>-2</sup> | interleukin               | 3.77 x 10 <sup>-2</sup> |
|                                                | response to pest/pathogen/parasite | 1.09 x 10 <sup>-10</sup> | Complement and coagulation cascades       | 4.77 x 10 <sup>-2</sup> |                           |                         |
|                                                | extracellular space                | 4.76 x 10 <sup>-7</sup>  |                                           |                         |                           |                         |
|                                                | cytokine activity                  | 1.03 x 10 <sup>-6</sup>  |                                           |                         |                           |                         |
|                                                | sugar binding                      | 1.05 x 10 <sup>-6</sup>  |                                           |                         |                           |                         |
|                                                | carbohydrate binding               | 2.52 x 10 <sup>-6</sup>  |                                           |                         |                           |                         |
|                                                | response to wounding               | 2.79 x 10 <sup>-6</sup>  |                                           |                         |                           |                         |
|                                                | extracellular                      | 3.11 x 10 <sup>-6</sup>  |                                           |                         |                           |                         |
|                                                | taxis                              | 2.06 x 10 <sup>-4</sup>  |                                           |                         |                           |                         |
|                                                | chemotaxis                         | 2.06 x 10 <sup>-4</sup>  |                                           |                         |                           |                         |
|                                                | heterophilic cell adhesion         | 3.22 x 10 <sup>-4</sup>  |                                           |                         |                           |                         |
|                                                | chemokine receptor binding         | 4.27 x 10 <sup>-4</sup>  |                                           |                         |                           |                         |
|                                                | chemokine activity                 | 4.27 x 10 <sup>-4</sup>  |                                           |                         |                           |                         |
|                                                | G-protein-coupled receptor binding | 4.27 x 10 <sup>-4</sup>  |                                           |                         |                           |                         |
|                                                | inflammatory response              | 7.42 x 10 <sup>-4</sup>  |                                           |                         |                           |                         |
|                                                | innate immune response             | 1.17 x 10 <sup>-3</sup>  |                                           |                         |                           |                         |
|                                                | chemoattractant activity           | 1.81 x 10 <sup>-3</sup>  |                                           |                         |                           |                         |
|                                                | plasma membrane                    | 1.86 x 10 <sup>-3</sup>  |                                           |                         |                           |                         |
|                                                | cytolysis                          | 2.02 x 10 <sup>-3</sup>  |                                           |                         |                           |                         |
|                                                | transmembrane receptor activity    | 2.62 x 10 <sup>-3</sup>  |                                           |                         |                           |                         |
|                                                | integral to membrane               | 1.10 x 10 <sup>-2</sup>  |                                           |                         |                           |                         |
|                                                | membrane                           | 1.12 x 10 <sup>-2</sup>  |                                           |                         |                           |                         |
|                                                | cell-cell adhesion                 | 3.04 x 10 <sup>-2</sup>  |                                           |                         |                           |                         |
| response to chemical substance                 | 3.32 x 10 <sup>-2</sup>            |                          |                                           |                         |                           |                         |

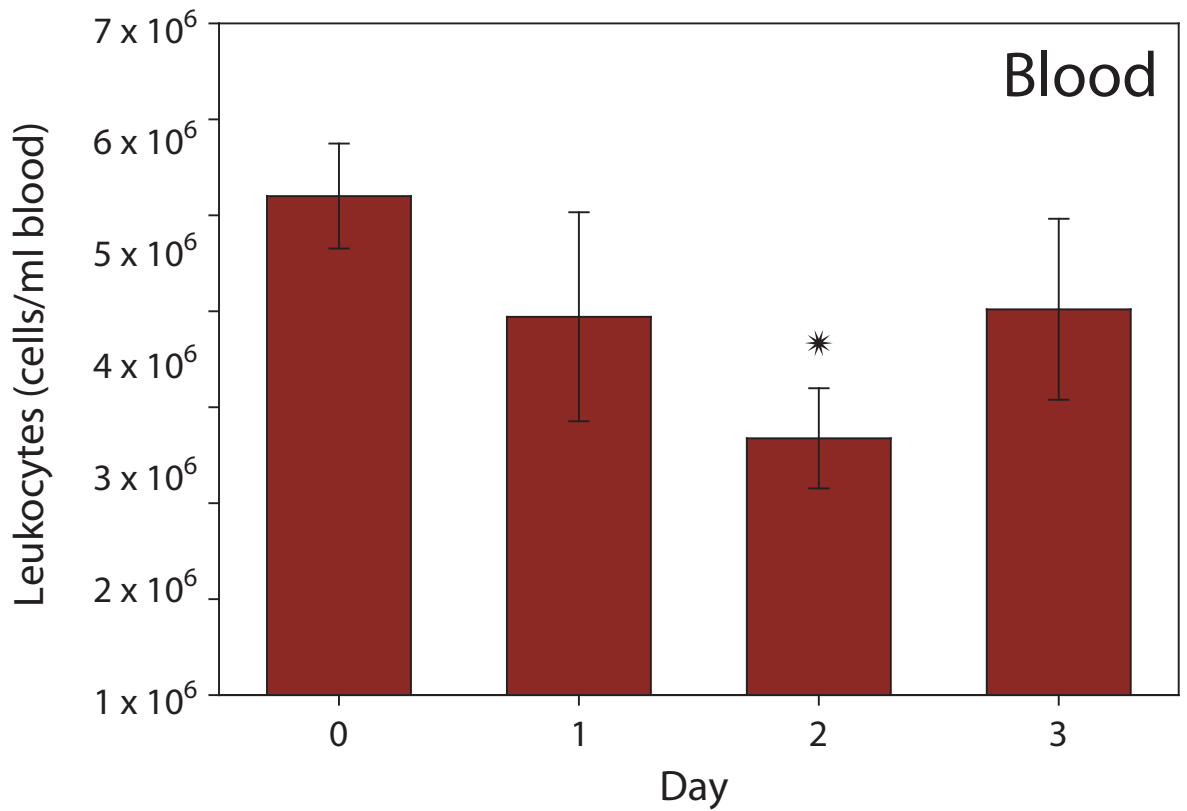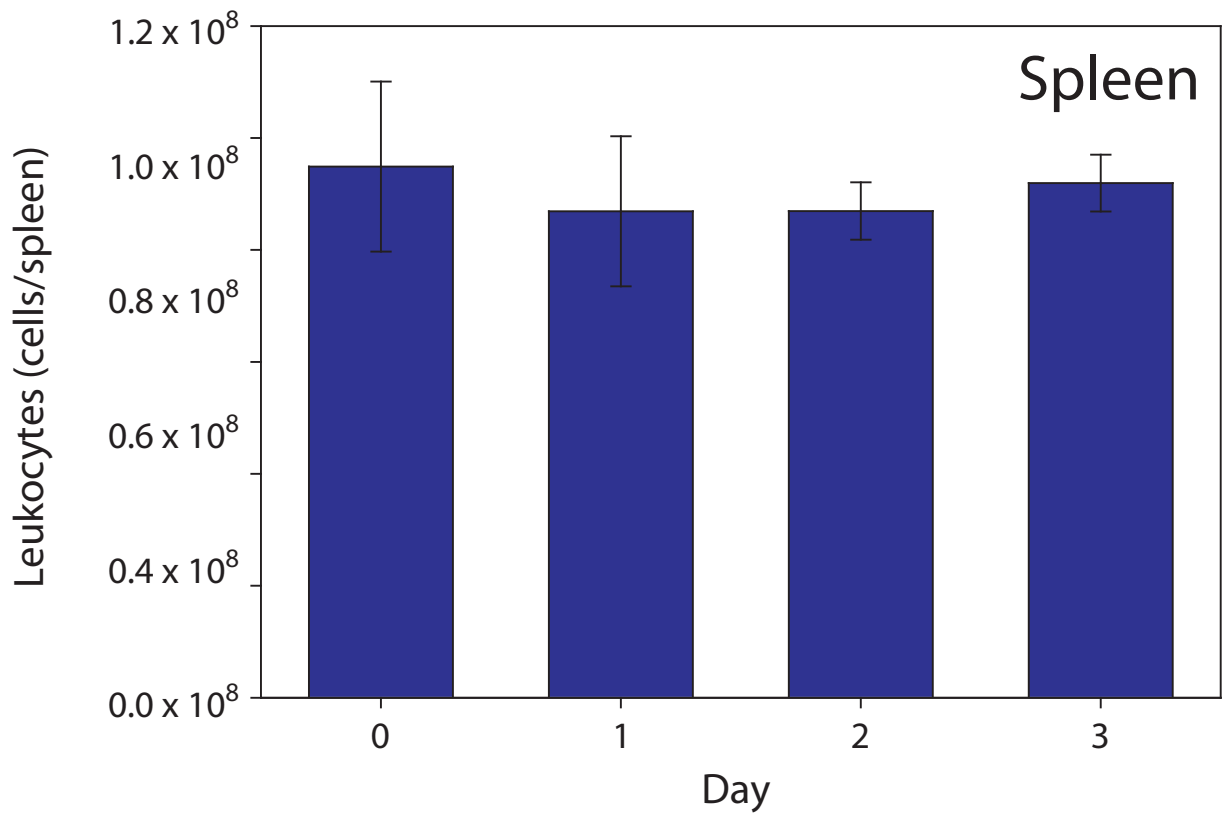

Mock-infected Blood  
*P. chabaudi* Blood

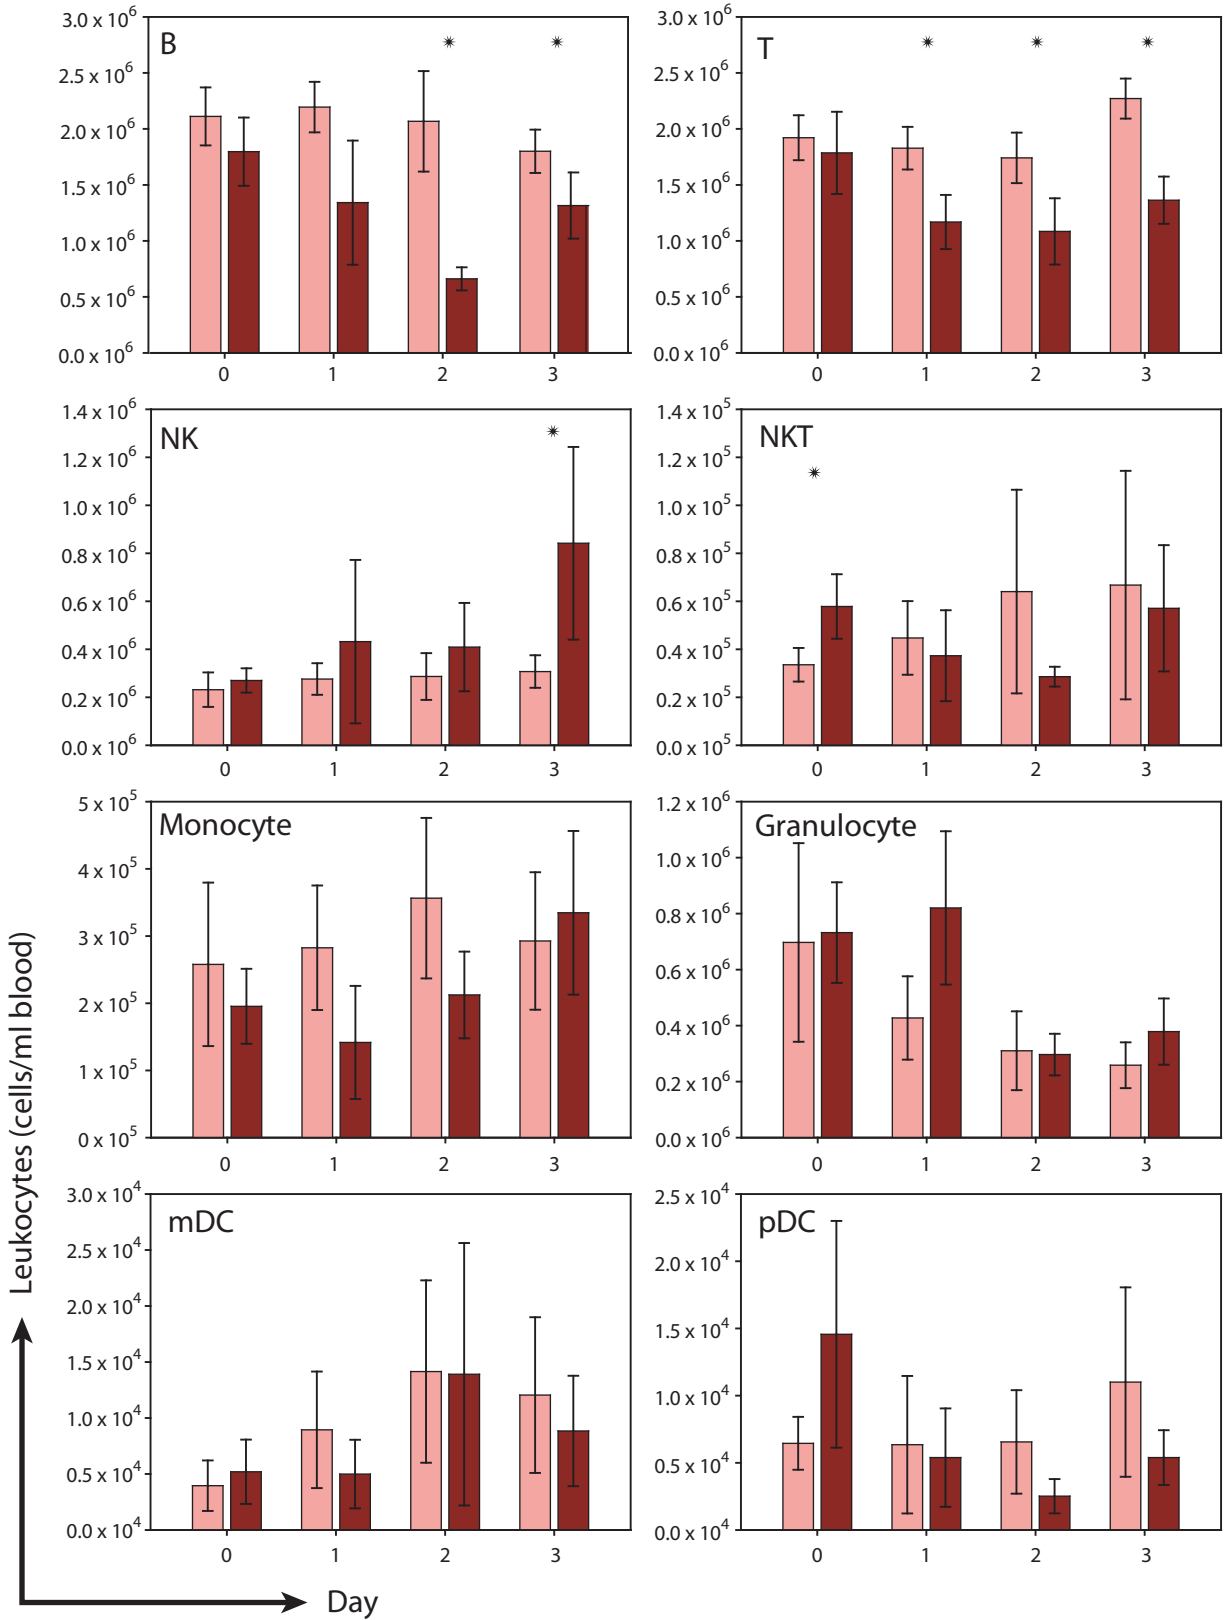

Mock-infected Spleen  
*P. chabaudi* Spleen

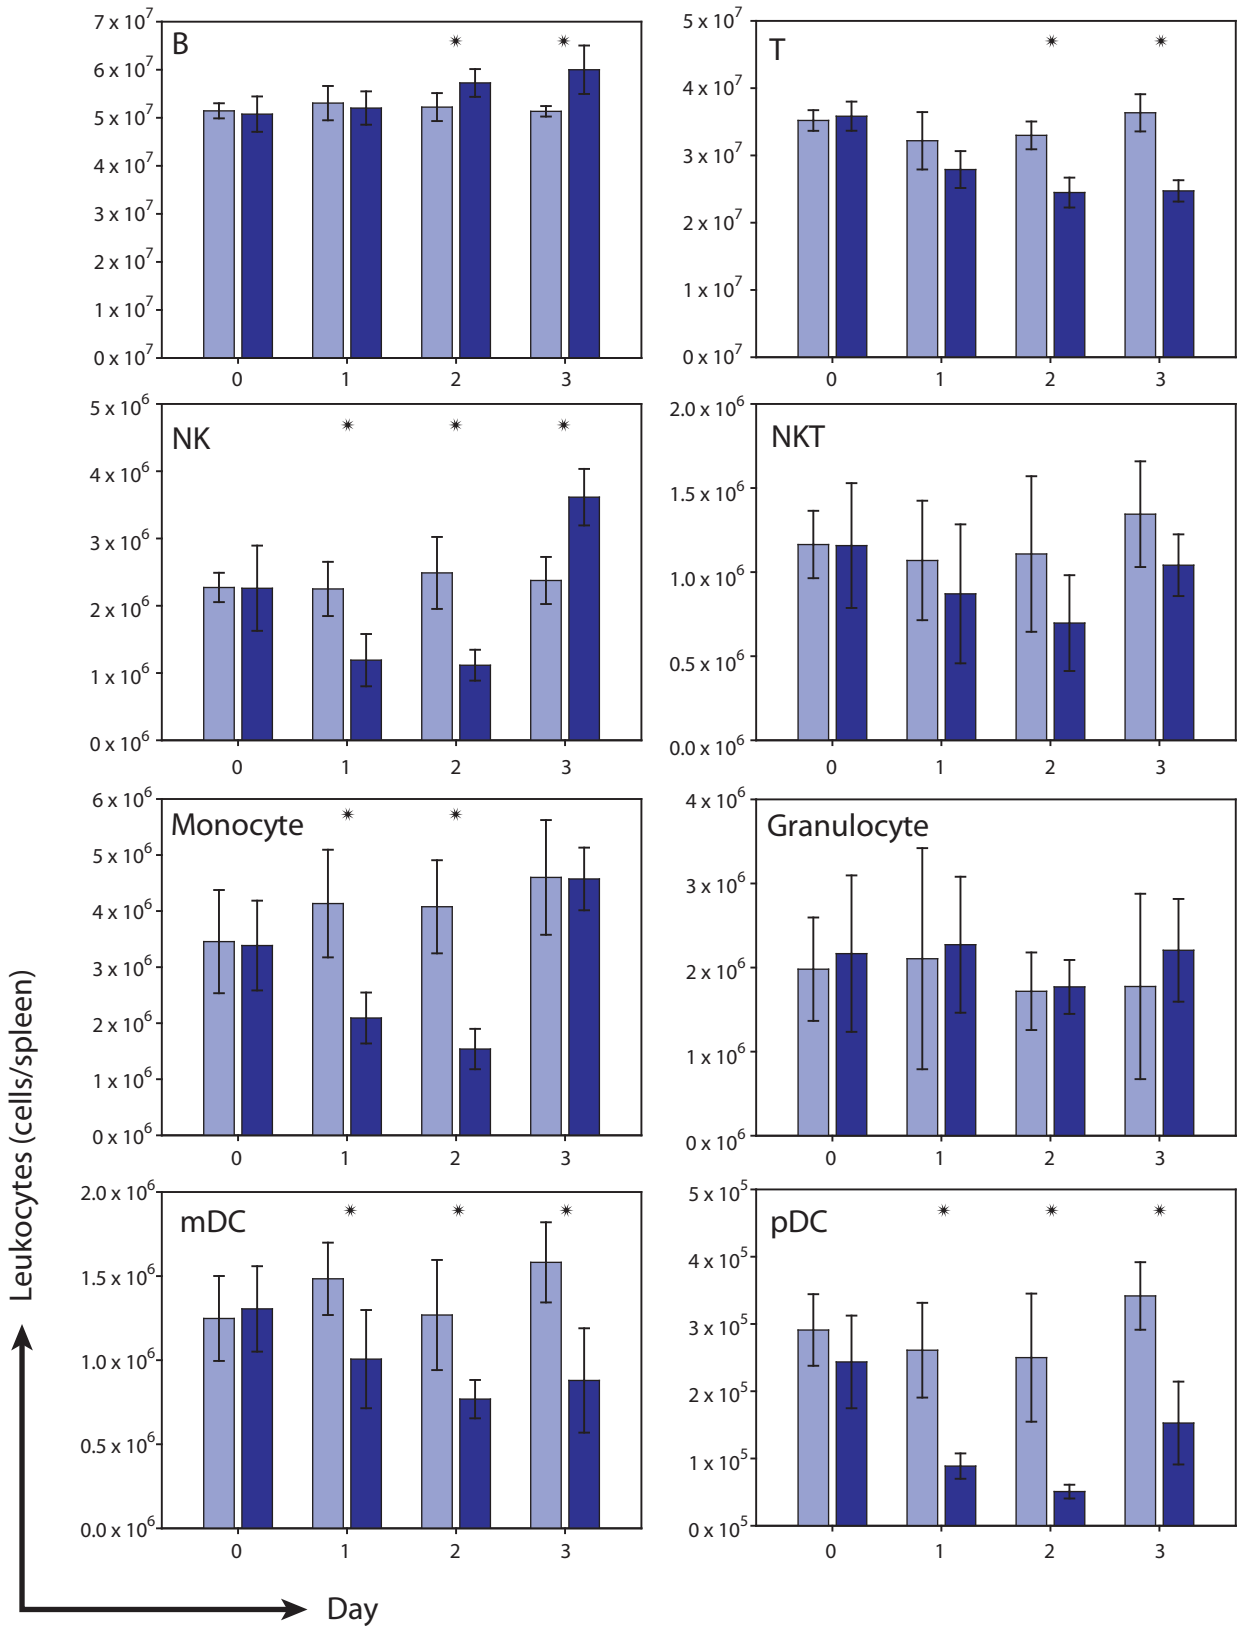

Supplement: supp_76_12_5873__1.pdf [file supp_76_12_5873__1.pdf]
